# Supplementary material
Source: MDPI journal article supplement (https://www.mdpi.com/2071-1050/13/19/10960)
Supplement: s1 [file s1 › sustainability-1360712-supplementary.pdf]

## **Students' survey questionnaire**

### Part 1a – sustainable and ecological design in the curriculum – expectations

In your opinion, on a scale from 1 (definitely no) to 5 (definitely yes):

- Is the topic of sustainable and ecological design important in architectural education?
- Is the topic of sustainable and ecological design interesting?
- Are the issues related to sustainable and ecological design in the following areas important?  
Should they be a part of architectural education?
  - Urban design
  - Spatial planning and ecosystem protection
  - Architectural design
  - Design of green spaces
  - Rehabilitation and adaptation of damaged areas
  - Restoration and adaptation of monuments
  - Eco-friendly and natural building materials
  - Energy-saving systems and technologies
  - Renewable energy
  - Water-saving systems and technologies
  - Closed-loop material cycle
- Should studies be the main source of knowledge regarding sustainable and ecological design?

### Part 1b – sustainable and ecological design in curriculum – experiences

In your opinion, on a scale from 1 (definitely no) to 5 (definitely yes):

- During the studies, did you get enough knowledge regarding sustainable and ecological design?
- Was the knowledge you received up to date?
- Were the issues related to sustainable and ecological design in the following areas included in the curriculum? Did you get enough information in these areas?
  - Urban design
  - Spatial planning and ecosystem protection
  - Architectural design
  - Design of green spaces
  - Rehabilitation and adaptation of damaged areas
  - Restoration and adaptation of monuments
  - Eco-friendly and natural building materials
  - Energy-saving systems and technologies
  - Renewable energy
  - Water-saving systems and technologies
  - Closed-loop material cycle

Open questions:

- What topics, issues and information were missing or insufficient?
- What other sources of information did you use? (trade (e.g. architectural) press/academic papers/courses and lectures/own subject studies/other - which?)

## Part 2 – course impressions – content and knowledge

In your opinion, on a scale from 1 (definitely no) to 5 (definitely yes):

- Was the course interesting?
- Did the scope of the course adequately complement the knowledge of sustainable and ecological design that you gained during your studies?
- Were the discussed topics well-chosen and sufficient for the preparation of the project?
- Did you gain new knowledge?

Open questions:

- On what subject did you gain new knowledge?
- Which of the covered topics was the most important, interesting?
- Which of the covered topics was the least important or unnecessary?
